# Supplementary material
Source: publisher figshare collection journal article supplement (https://gsapubs.figshare.com/ndownloader/files/23316044)
Supplement: Supplementary file 1 [file 23316044]

## 1    **SUPPLEMENTS**

### 2    **Sample description**

#### 3    ***Yuli belt***

4            Sample YL10N01 consists mainly of quartz, albite, and muscovite, with minor and  
5    accessory chlorite, tourmaline. Main constituent minerals are fine, and most quartz and albite  
6    are less than 50  $\mu\text{m}$ . Crenulation cleavages are developed, which is mainly composed by  
7    micas. Black carbonaceous materials (CM) are abundantly included within the sample.

8            Sample F10803 is well foliated and contains quartz, phengitic muscovite, albite,  
9    chlorite, paragonite, garnet, and CM. Accessory minerals are ilmenite, rutile, titanite,  
10    epidote/allanite, tourmaline, pyrite, chalcopyrite, iron-oxide, calcite, ankerite, and zircon.  
11    Foliation is defined by interlayers of mica + chlorite and quartz. Garnet and albite are  
12    porphyroblastic but the former tends to be replaced by chlorite. Albite porphyroblasts contain  
13    inclusions of quartz, calcite, tourmaline, zircon, ilmenite, and CM, with internal foliation.  
14    Titanite is also a porphyroblastic phase and contains quartz and carbonate inclusions.

15            Sample C121107 contains graphite, quartz, phengitic muscovite, paragonite, garnet,  
16    chlorite, albite, and accessory rutile, titanite, ilmenite, calcite, pyrite, tourmaline, allanite, and  
17    apatite. Two generations of phengitic muscovite can be recognized: i) intergrown with  
18    paragonite in the main foliation; ii) randomly oriented flakes as part of a retrograde  
19    assemblage. Garnet porphyroclasts, up to 2 mm in diameter, are sharply zoned with pink  
20    graphite-free cores and graphite-bearing rims. Garnet inclusions are ilmenite and quartz in the  
21    core and phengitic muscovite, chlorite, quartz, paragonite and rutile in the rim. Chlorite  
22    appears to exhibit two textures: i) porphyroblastic as part of an earlier assemblage; ii)  
23    replacing garnet and as aggregates with phengitic muscovite + quartz in the matrix as a  
24    retrograde phase. Rutile is included in garnet rims and is also a matrix mineral.

#### 25    ***Sanbagawa metamorphic belt, southwest Japan***

26 For the comparison of the Yuli belt, three metapelite samples collected in the  
27 Sanbagawa metamorphic belt in the Asemigawa region, central Shikoku in southwest Japan,  
28 were used. The metamorphic zonation in the Sanbagawa belt is divided to chlorite, garnet  
29 albite-biotite, and oligoclase-biotite zones from low to high grade based on the mineral  
30 assemblage of the metapelites (Enami, 1983; Higashino, 1990). In this study, representative  
31 samples from garnet zone, albite-biotite zone, and oligoclase-biotite zone were selected. The  
32 metapelitic samples in the Sanbagawa belt mainly contain quartz, albite, phengite, chlorite,  
33 epidote, CM, together with subordinated amounts of titanite, apatite, tourmaline, rutile, and  
34 zircon. The sample from the garnet zone (NSY11-24) includes garnet. The value of  $T_{R2}$  is  
35 385-447 °C ( $R2 = 0.44-0.58$ ). The metapelite from the albite-biotite zone (NSY12-42)  
36 includes biotite. The ranges of  $T_{R2}$  is 411-495 °C ( $R2 = 0.33-0.52$ ). The oligoclase appears in  
37 the sample from the oligoclase-biotite zone (NSY9-2) and  $T_{R2}$  is 475-570 °C ( $R2 = 0.16-$   
38  $0.37$ ). The mineral assemblage and texture of the chlorite zone is similar to that of the sample  
39 YL10N01 from north edge of the Yuli belt. The metamorphic temperature of the chlorite  
40 zone of the Sanbagawa belt is usually considered at around 330 °C (Enami et al., 1994),  
41 which is the lower limit of the Raman CM geothermometer. However, despite the similarity  
42 of mineral assemblages and textures, YL10N01 collected from the northeastern edge of the  
43 Yuli belt contains mismatched high crystalline CMs.

#### 44 ***Daimonji contact aureole, southwest Japan***

45 The sample information of the Daimonji contact aureole of N33, N27, and N9 is  
46 described in Aoya et al. (2010). In the Daimonji area, three metamorphic zones are defined  
47 by Nakamura (1995): the chlorite, biotite, and cordierite zones, in ascending order of  
48 metamorphic temperatures based on the mineral assemblage of metapelites. N33 in the  
49 chlorite zone shows  $T_{R2} = <330-422$  °C ( $R2 = 0.49-0.75$ ). N27 in the biotite zone shows  $T_{R2}$

50 = 461-523 °C ( $R_2 = 0.27-0.40$ ). N9 in the cordierite zone shows  $T_{R2} = 454-597$  °C ( $R_2 =$   
51 0.10-0.42).

52

### 53 **Measurement conditions**

54 We conducted Raman spectroscopy analyses of CM grains in the samples and  
55 estimated peak temperatures using the Raman CM geothermometer. Raman spectra of the  
56 CM were obtained using a Nicolet Almega XR (Thermo Scientific, Yokohama, Japan) with a  
57 532 nm Nd-YAG laser passed through a confocal microscope (BX51; Olympus, Tokyo,  
58 Japan) with a 100× objective (Olympus Mplan-BD 100X, NA = 0.90). The laser power at the  
59 sample surface was set to 1–3 mW. The scattered light was collected by a backscattered  
60 geometry with a 25 µm pinhole and a holographic notch filter, dispersed using a 2400  
61 lines/mm grating, and analyzed by a Peltier cooled CCD detector comprising  $256 \times 1024$   
62 pixels (Andor Technology, Belfast, Northern Ireland). The acquisition time of the CM spectra  
63 was 30 s. The spatial resolution was  $\sim 1$  µm and wavenumber resolution was  $\sim 1$  cm<sup>-1</sup>. To  
64 avoid mechanical damage to the CM grains, we carefully selected CMs that were embedded  
65 within other transparent minerals and did not occur at the sample surface. We measured at  
66 least 30 CM grains from each sample.

67

### 68 **Data processing**

69 The Raman spectra of CM were decomposed into several peaks using the program  
70 PeakFit 4.12 (SeaSolve Software, Massachusetts, USA) with a pseudo-Voigt function  
71 (Gaussian–Lorentzian Sum). The spectra were corrected for the fluorescence background by  
72 subtracting a linear baseline in the spectral range of 1000–1750 cm<sup>-1</sup>. The Raman spectra of  
73 CM were decomposed to the G-band (1580 cm<sup>-1</sup>), D1-band (1350 cm<sup>-1</sup>), and D2-band (1620

74  $\text{cm}^{-1}$ ). We evaluated the crystallinity of CM by using the parameter R2, which is the area  
75 ratio of  $D1/(G + D1 + D2)$ , as proposed by Beyssac et al. (2002).

76 The parameter R2 [=  $D1/(G + D1 + D2)_{\text{area}}$ ] decreases with increasing peak  
77 metamorphic temperature (Beyssac et al., 2002). We calculated the metamorphic temperature  
78 ( $T_{R2}$ ) using the Raman CM geothermometer proposed by Beyssac et al. (2002), as follows:

79

80 
$$T_{R2} = -445 \times R2 + 641. \quad (2)$$

81

82 The applicable temperature range is 330–650 °C and the error is  $\pm 50$  °C.

83

#### 84 **CM Raman spectra**

85 Representative CM Raman spectra of maximum, average, and minimum  $T_{R2}$  for of the  
86 samples YL10N01, F10803, and C121107 are shown in Figure DR1. Every spectrum shows  
87 G-, D1-, and D2-bands excluding the D2-band of the highest  $T_{R2}$  one. Intensities of the D1-  
88 and D2-bands are highest at minimum  $T_{R2}$  spectra especially in the sample YL10N01 that  
89 shows the lowest temperature of 404 °C. The spectra showing near highest  $T_{R2}$  are likely to  
90 be detrital graphite because there are statistical outliers in F10803 and C121107.

91

#### 92 **REFERENCES CITED**

93 Aoya, M., Kouketsu, Y., Endo, S., Shimizu, H., Mizukami, T., Nakamura, D., and Wallis, S.,  
94 2010, Extending the applicability of the Raman carbonaceous-material geothermometer  
95 using data from contact metamorphic rocks: *Journal of Metamorphic Geology*, v. 28, p.  
96 895–914.

- 97 Beyssac, O., Goffe, B., Chopin, C., and Rouzaud, J.N., 2002, Raman spectra of carbonaceous  
 98 material in metasediments; a new geothermometer: *Journal of Metamorphic Geology*, v.  
 99 20, no. 9, p. 858–871.
- 100 Enami, M., 1983, Petrology of pelitic schists in the oligoclase-biotite zone of the Sanbagawa  
 101 metamorphic terrain, Japan: phase equilibria in the highest grade zone of a high-pressure  
 102 intermediate type of metamorphic belt: *Journal of Metamorphic Geology*, v. 1, p. 141 -  
 103 161.
- 104 Enami, M., Wallis, S. and Banno, Y., 1994, Paragenesis of sodic pyroxene-bearing quartz  
 105 schists: implications for the P-T history of the Sanbagawa belt: *Contributions to*  
 106 *Mineralogy and Petrology*, v. 116, p. 182–198.
- 107 Higashino, T., 1990, The higher grade metamorphic zonation of the Sambagawa  
 108 metamorphic belt in central Shikoku, Japan: *Journal of Metamorphic Geology*, v. 8, p.  
 109 413–23.
- 110 Nakamura, D., 1995, Comparison and interpretation of graphitization in contact and regional  
 111 metamorphic rocks: *The Island Arc*, v. 4, p. 112–127.

112

### 113 **FIGURE CAPTIONS**

114 Figure DR1. Representative Raman spectra of CM in the samples YL10N01, F10803, and  
 115 C121107. The top row is the spectra of the lowest  $T_{R2}$ , the middle is near the average value,  
 116 and the bottom row is the spectra of the highest  $T_{R2}$ .

Fig. DR1

YL10N01

F10803

C121107

Min  $T_{R2}$

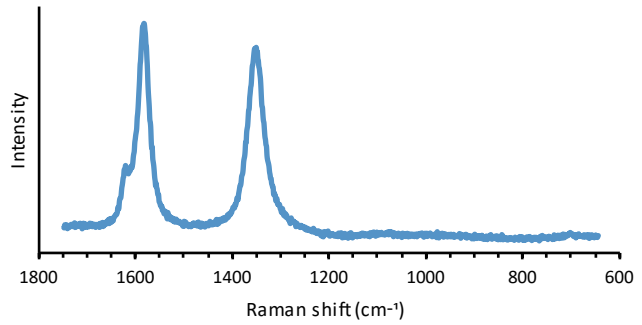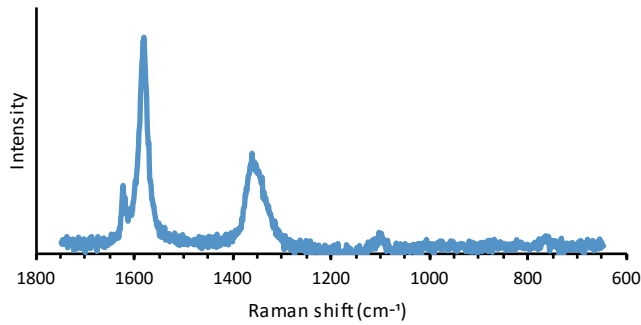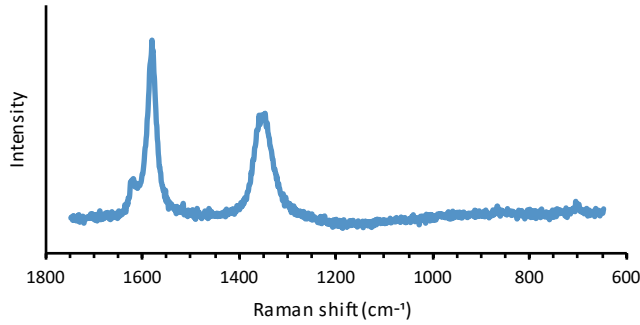

Ave  $T_{R2}$

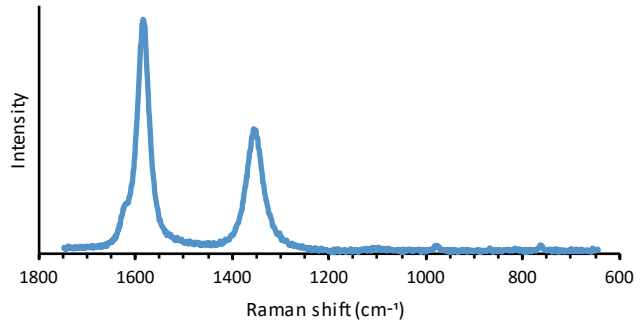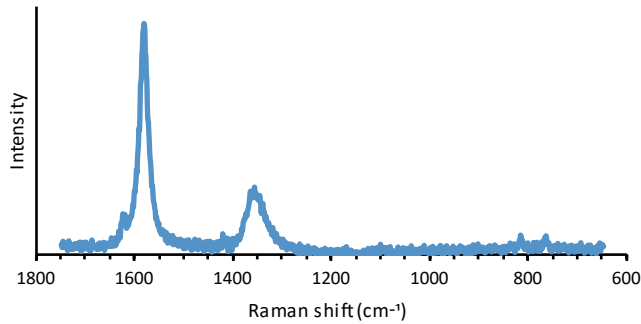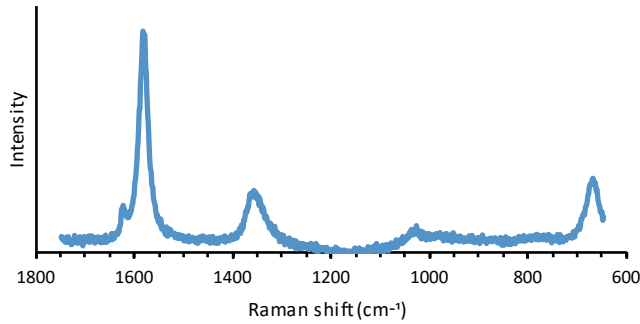

Max  $T_{R2}$

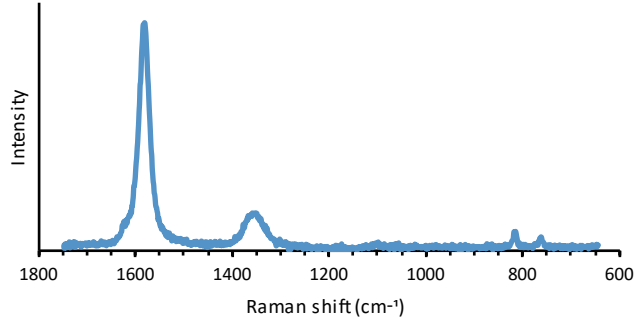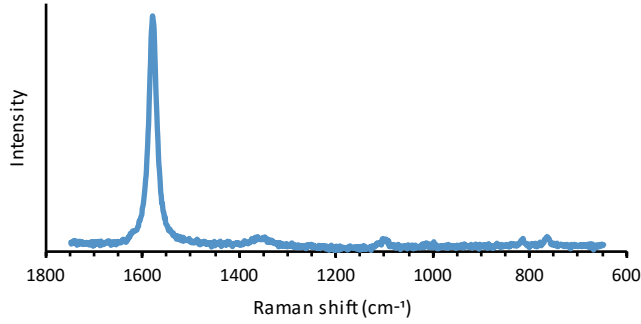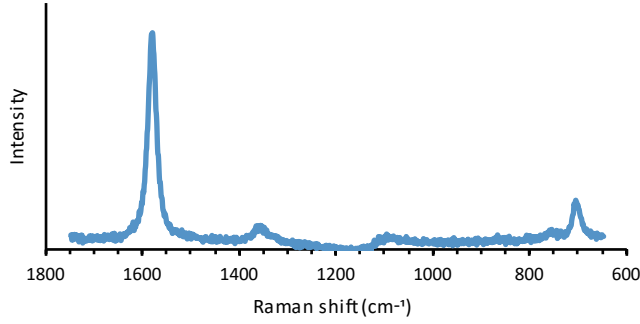

Table DR1. Summary of CM Raman spectra data of the samples from the Yuli belt, Sanbagawa metamorphic belt, and Daimonji contact aureole.

| Sample         | $n$ | R1 ratio | $1\sigma$ | R2 ratio | $1\sigma$ | Ave. $T_{R2}$ (°C) | $1\sigma$ (°C) |
|----------------|-----|----------|-----------|----------|-----------|--------------------|----------------|
| Yuli belt      |     |          |           |          |           |                    |                |
| YL10N01        | 62  | 0.50     | 0.22      | 0.39     | 0.09      | 465                | 40             |
| F10803         | 37  | 0.24     | 0.11      | 0.32     | 0.09      | 496                | 41             |
| C121107        | 31  | 0.19     | 0.08      | 0.29     | 0.09      | 514                | 40             |
| Sanbagawa belt |     |          |           |          |           |                    |                |
| NSY11-24       | 43  | 0.83     | 0.12      | 0.50     | 0.03      | 421                | 13             |
| NSY12-42       | 34  | 0.52     | 0.12      | 0.42     | 0.04      | 454                | 19             |
| NSY9-2         | 31  | 0.19     | 0.07      | 0.27     | 0.06      | 520                | 27             |
| Daimonji       |     |          |           |          |           |                    |                |
| N33            | 36  | 1.33     | 0.36      | 0.61     | 0.07      | 368                | 32             |
| N27            | 55  | 0.32     | 0.06      | 0.34     | 0.04      | 491                | 16             |
| N9             | 29  | 0.18     | 0.06      | 0.23     | 0.06      | 539                | 26             |

$n$ : number of Raman spectra, R1: intensity ratio of D1- and G-bands ( $[D1/G]_{Intensity}$ ), R2: area ratio of D1-, D2-, and G-bands ( $[D1/(D1 + D2 + G)]_{Area}$ ),  $1\sigma$ : standard deviation, Ave.  $T_{R2}$ : average  $T_{R2}$ .
